# Supplementary material
Source: publisher figshare collection journal article supplement (https://karger.figshare.com/articles/dataset/_/8267975)
Supplement: Supplementary file 1 [file 1]

**Supplementary Table 1. Area of the HCN at each slice level and imaging modality in both groups**

| Imaging modality | Slice level | HD                 |                    |                    | AD                 |                    |                    | PD                 |                    |                    | DRPLA              |                    |                    | NCNS               |                    |                    | P value               |
|------------------|-------------|--------------------|--------------------|--------------------|--------------------|--------------------|--------------------|--------------------|--------------------|--------------------|--------------------|--------------------|--------------------|--------------------|--------------------|--------------------|-----------------------|
|                  |             | Mini               | Median             | Maxi               |                       |
|                  |             | (mm <sup>2</sup> ) |                       |
| T2WI             | caudal      | 45.5               | 55.2               | 80.5               | 83.7               | 98.2               | 108                | 83.5               | 98.4               | 115                | 86.6               | 91.9               | 111                | 80.4               | 99.7               | 126                | 4.63×10 <sup>-6</sup> |
|                  | rostral     | 34.8               | 61.8               | 84.9               | 88.4               | 104                | 113                | 92.1               | 104                | 124                | 97.1               | 100                | 117                | 89.2               | 112                | 153                | 3.75×10 <sup>-7</sup> |
| T1WI             | caudal      | 35.3               | 52.1               | 75.8               | 83.7               | 95.6               | 108                | 83.3               | 97.9               | 116                | 86.2               | 94.7               | 111                | 79.2               | 99.3               | 118                | 4.26×10 <sup>-5</sup> |
|                  | rostral     | 32.8               | 47.4               | 81.9               | 88.5               | 102                | 115                | 91.0               | 103                | 122                | 98.0               | 101                | 116                | 91.7               | 111                | 148                | 3.39×10 <sup>-6</sup> |
| FLAIR            | caudal      | 46.0               | 56.8               | 79.1               | 84.9               | 98.1               | 107                | 83.5               | 98.1               | 113                | 86.8               | 94.5               | 111                | 74.4               | 96.6               | 121                | 6.46×10 <sup>-5</sup> |
|                  | rostral     | 40.2               | 65.7               | 79.9               | 88.8               | 104                | 115                | 90.2               | 104                | 155                | 98.0               | 101                | 116                | 92.6               | 107                | 129                | 1.48×10 <sup>-5</sup> |

HCN, head of caudate nucleus; HD, Huntington’s disease; AD, Alzheimer’s disease; PD, Parkinson’s disease; DRPLA, denratrubral-pallidoluysian atrophy; NCNS, non-neurodegenerative disorders in the central nervous system; Mini, minimum; Maxi, maximum; T2WI, T2-weighted images; T1WI, T1-weighted images; FLAIR, fluid attenuated inversion recovery

**Supplementary Table 2. Correlation analysis of MRI modality with clinical factors**

|               | Age at MRI |                | Age of onset |                | Disease duration |                | Number of CAG repeat |                |
|---------------|------------|----------------|--------------|----------------|------------------|----------------|----------------------|----------------|
|               | $\rho$     | <i>P</i> value | $\rho$       | <i>P</i> value | $\rho$           | <i>P</i> value | $\rho$               | <i>P</i> value |
| T2WI caudal   | -0.20      | 0.58           | -0.25        | 0.49           | -0.41            | 0.24           | 0.15                 | 0.73           |
| T2WI rostral  | 0.07       | 0.84           | 0.16         | 0.64           | -0.61            | 0.046*         | 0.17                 | 0.69           |
| T1WI caudal   | 0.10       | 0.81           | -0.03        | 0.95           | 0.07             | 0.85           | 0.25                 | 0.59           |
| T1WI rostral  | -0.22      | 0.54           | -0.18        | 0.63           | -0.37            | 0.30           | 0.34                 | 0.45           |
| FLAIR caudal  | -0.13      | 0.74           | 0.20         | 0.61           | -0.11            | 0.78           | 0.32                 | 0.44           |
| FLAIR rostral | -0.25      | 0.52           | 0.17         | 0.68           | -0.31            | 0.43           | 0.29                 | 0.48           |

$\rho$ ; Spearman's rank correlation coefficient \*:  $P < 0.05$ .

MRI, magnetic resonance imaging; T2WI, T2-weighted images; T1WI, T1-weighted images; FLAIR, fluid attenuated inversion recovery
